# Supplementary material for: A new phase diagram of water under negative pressure: The rise of the lowest-density clathrate s-III
Source: PubMed Central journal article supplement — Sci Adv. 2016 Feb 12;2(2):e1501010. doi: 10.1126/sciadv.1501010 (PMC4758744; doi:10.1126/sciadv.1501010), 2016-02-12
Supplement: 1501010_SM.pdf [file 1501010_SM.pdf]

## Supplementary Materials for

### A new phase diagram of water under negative pressure: The rise of the lowest-density clathrate s-III

Yingying Huang, Chongqin Zhu, Lu Wang, Xiaoxiao Cao, Yan Su, Xue Jiang, Sheng Meng, Jijun Zhao, Xiao Cheng Zeng

Published 12 February 2016, *Sci. Adv.* **2**, e1501010 (2016)  
DOI: 10.1126/sciadv.1501010

#### The PDF file includes:

Table S1. Fractional coordinates of the structure III (s-III) clathrate with cubic lattice (space group:  $P\bar{4}3n$ , lattice constant: 13.431 Å) from vdW-DF2 DFT calculation.

Table S2. Average lengths of O–H covalent bond ( $d_{\text{O-H}}$ ) and hydrogen bond ( $d_{\text{O...H}}$ ) for different phases (ice XI, ice *i*, s-I, s-II, s-H, SGT, s-K, s-T, and s-III clathrates) based on vdW-DF2 DFT computation.

Table S3. Mass density ( $\rho$ ) and lattice cohesive energy per water molecule ( $E_{\text{latt}}$ ) for different phases (ice XI, ice *i*, s-I, s-II, s-H, SGT, s-K, s-T, and s-III clathrates) based on vdW-DF2 (DFT) optimization, and another independent optimization using the TIP4P/2005 water model (at zero temperature and zero pressure).

Fig. S1. Phonon dispersion for guest-free s-III ice clathrate based on vdW-DF2 DFT computation.

Fig. S2. Crystal structures ( $2 \times 2$  unit cells) of ice *i*, ice XI, and clathrates of s-T, s-I, s-II, s-K, SGT, and s-H phases (blue dash lines for hydrogen bonds, red for oxygen, and white for hydrogen).

Fig. S3. Lattice cohesive energies ( $E_{\text{latt}}$ ) for structures ice XI, ice *i*, s-K, s-I, s-II, s-H, s-III, SGT, and s-T clathrates as a function of volume per water molecule.

Fig. S4. Computed Helmholtz energy ( $A_{\text{sol}}$ ) of the s-III clathrate based on the TIP4P/2005 potential, using the Einstein method, as a function of real-space cutoff distance  $r_{\text{cutoff}}$ .

**Table S1.** Fractional coordinates of the structure III (s-III) clathrate with cubic lattice (space group:

$P\bar{4}3n$ , lattice constant: 13.431 Å) from vdW-DF2 DFT calculation.

| Atom | <i>X</i> | <i>Y</i> | <i>Z</i> | Occupancy |
|------|----------|----------|----------|-----------|
| O    | 0.74614  | 0.09977  | 0.60926  | 1.0       |
| O    | 0.59947  | 0.10939  | 0.75379  | 1.0       |
| H    | 0.69099  | 0.11146  | 0.65675  | 1.0       |
| H    | 0.76134  | 0.02799  | 0.61380  | 1.0       |
| H    | 0.61120  | 0.15692  | 0.80890  | 1.0       |
| H    | 0.52764  | 0.11385  | 0.73868  | 1.0       |

**Table S2.** Average lengths of O–H covalent bond ( $d_{\text{O-H}}$ ) and hydrogen bond ( $d_{\text{O...H}}$ ) for different phases (ices XI, ice  $i$ , s-I, s-II, s-H, SGT, s-K, s-T, and s-III clathrates) based on vdW-DF2 DFT computation.

| Phase                           | Ice   |       | Clathrate |       |       |       |       |       |       |
|---------------------------------|-------|-------|-----------|-------|-------|-------|-------|-------|-------|
|                                 | XI    | $i$   | s-I       | s-K   | s-II  | s-T   | s-H   | SGT   | s-III |
| $d_{\text{O-H}} (\text{\AA})$   | 0.995 | 0.995 | 0.995     | 0.995 | 0.995 | 0.995 | 0.995 | 0.995 | 0.995 |
| $d_{\text{O...H}} (\text{\AA})$ | 1.795 | 1.795 | 1.775     | 1.775 | 1.775 | 1.805 | 1.795 | 1.595 | 1.795 |

**Table S3.** Mass density ( $\rho$ ) and lattice cohesive energy per water molecule ( $E_{\text{latt}}$ ) for different phases (ice XI, ice *i*, s-I, s-II, s-H, SGT, s-K, s-T, and s-III clathrates) based on vdW-DF2 (DFT) optimization, and another independent optimization using the TIP4P/2005 water model (at zero temperature and zero pressure).

| Method                      |            | Ice    |          |       |       | Clathrate |       |       |       |       |
|-----------------------------|------------|--------|----------|-------|-------|-----------|-------|-------|-------|-------|
|                             |            | XI     | <i>i</i> | s-I   | s-K   | s-II      | s-T   | s-H   | SGT   | s-III |
| $\rho$ (g/cm <sup>3</sup> ) | vdW-DF2    | 0.900  | 0.855    | 0.813 | 0.808 | 0.804     | 0.792 | 0.768 | 0.722 | 0.593 |
|                             | TIP4P/2005 | 0.969  | 0.897    | 0.842 | 0.841 | 0.830     | 0.839 | 0.811 | 0.771 | 0.605 |
| $E_{\text{latt}}$ (kJ/mol)  | vdW-DF2    | 62.840 | 61.310   | 61.38 | 60.76 | 61.37     | 60.23 | 60.79 | 59.27 | 55.77 |
|                             | TIP4P/2005 | 63.100 | 61.580   | 62.02 | 61.58 | 61.96     | 61.13 | 61.60 | 60.36 | 57.27 |

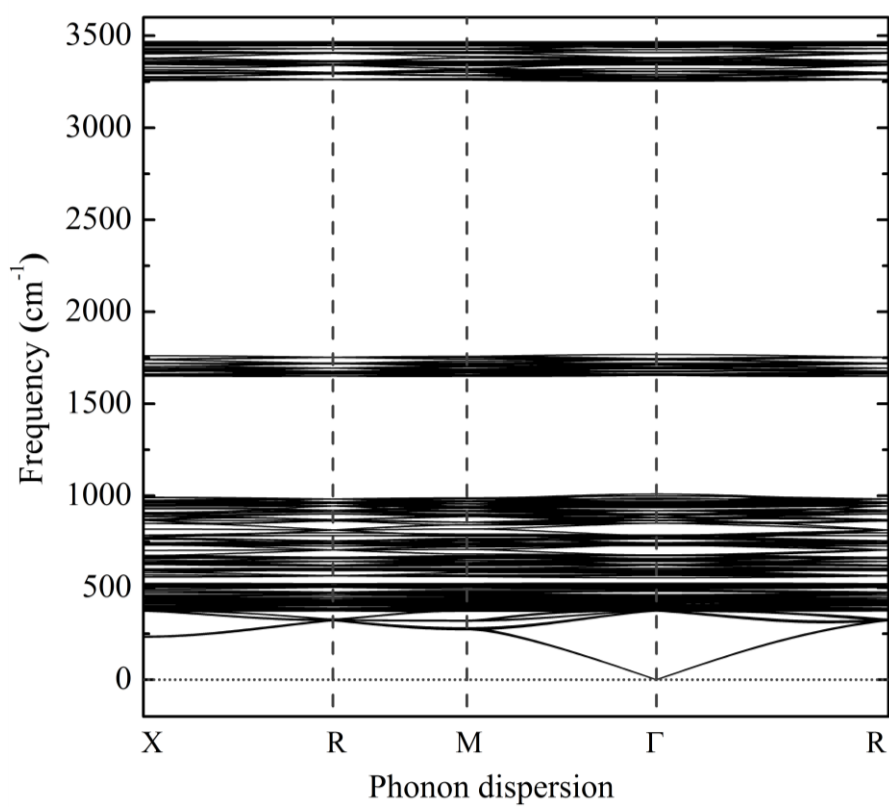

**Figure S1.** Phonon dispersion for guest-free s-III ice clathrate based on vdW-DF2 DFT computation.

Definition of special points in the Brillouin zone: X - (0.5, 0.0, 0.0), R - (0.5, 0.5, 0.5), M - (0.5, 0.5, 0.0),  $\Gamma$  - (0.0, 0.0, 0.0).

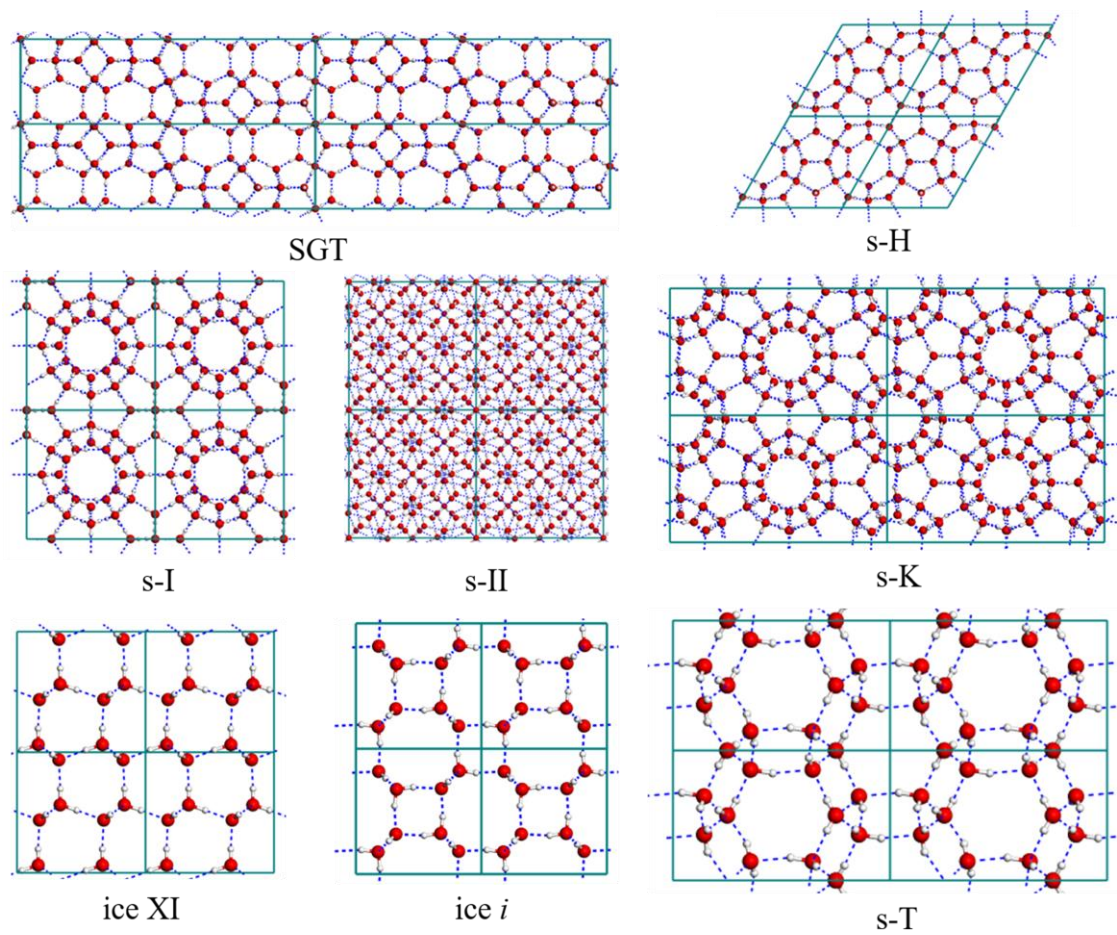

**Figure S2.** Crystal structures ( $2 \times 2$  unit cells) of ice *i*, ice XI, and clathrates of s-T, s-I, s-II, s-K, SGT, and s-H phases (blue dash lines for hydrogen bonds, red for oxygen, and white for hydrogen).

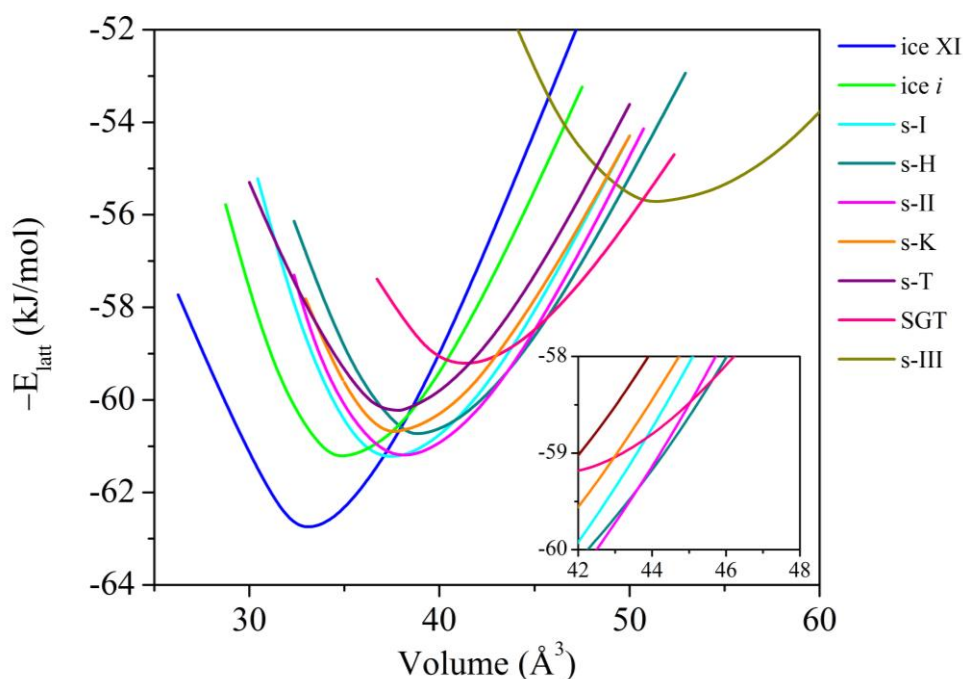

**Figure S3.** Lattice cohesive energies ( $E_{\text{latt}}$ ) for structures ice XI, ice *i*, s-K, s-I, s-II, s-H, s-III, SGT, and s-T clathrates as function of volume per water molecule. Inset is amplification of the region for the volume between  $42 \text{ \AA}^3$  and  $48 \text{ \AA}^3$ .  $E_{\text{latt}}$  is defined as:  $E_{\text{latt}} = E_w - E_{\text{cry}}/N$ , where  $N$  is the number of water molecules in the crystal,  $E_{\text{cry}}$  and  $E_w$  are the total energies of the ice/clathrate crystal and an individual water molecule, respectively. We also considered the ice *i'* (13) and ice 0 (5) polymorphs, which are not shown in this Figure for a clear view, since the curve of ice *i'* basically overlaps with ice *i* and the entire energy-volume curve of ice 0 is higher than that of the reference ice XI.

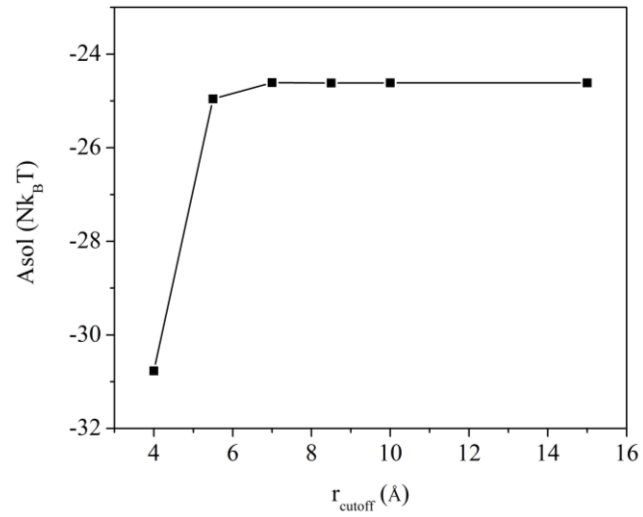

**Figure S4.** Computed Helmholtz energy ( $A_{\text{sol}}$ ) of the s-III clathrate based on the TIP4P/2005 potential, using the Einstein method, as a function of real-space cutoff distance  $r_{\text{cutoff}}$ . In the simulations, the thermodynamic conditions are 200 K and 1 bar.
